# Supplementary material for: Development of a new and environmentally-friendly method to evaluate phenolic compounds from Flos Lonicerae Japonicae with ultra-high performance supercritical fluid chromatography (UHPSFC) combined with chemometrics
Source: Royal Society of Chemistry journal article supplement (doi:10.1039/c8ay01408f), 2018-01-01
Supplement: c8ay01408f1.pdf [file c8ay01408f1.pdf]

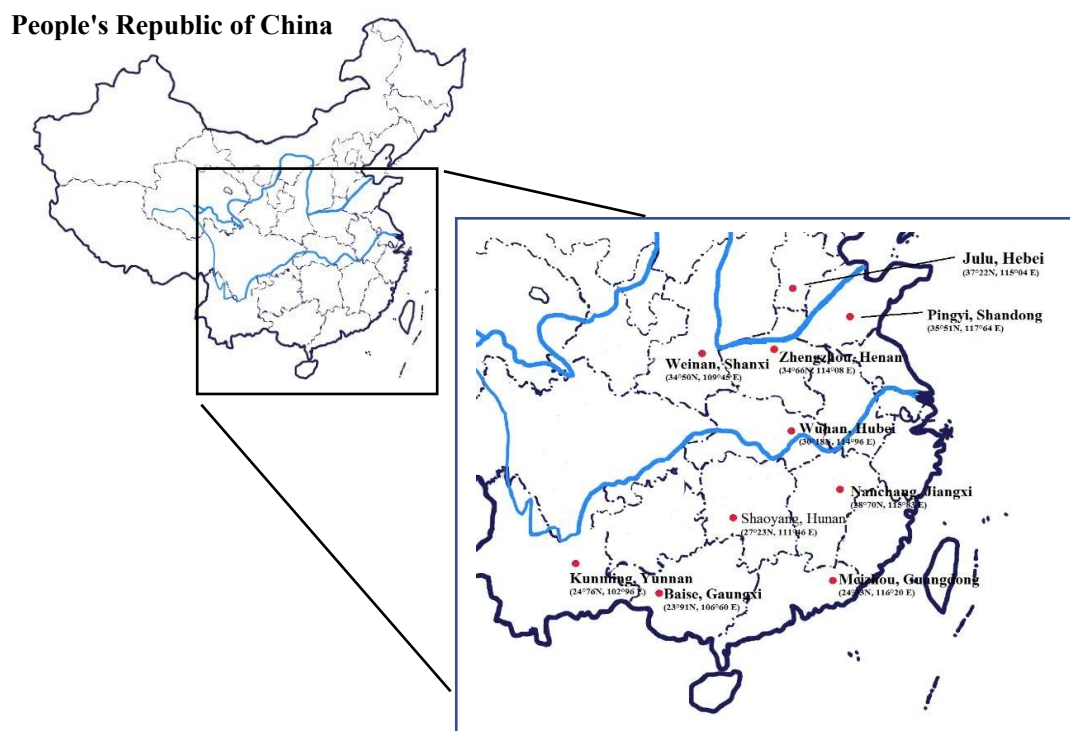

Fig. 1S. Map of region where the samples are collected (Red origin) in China.

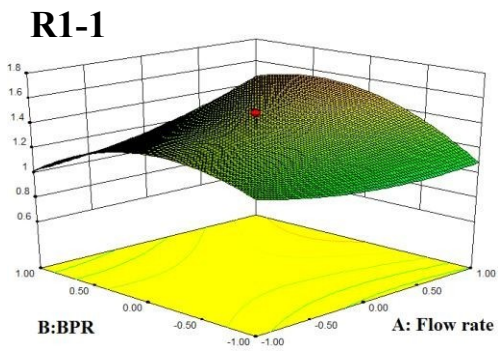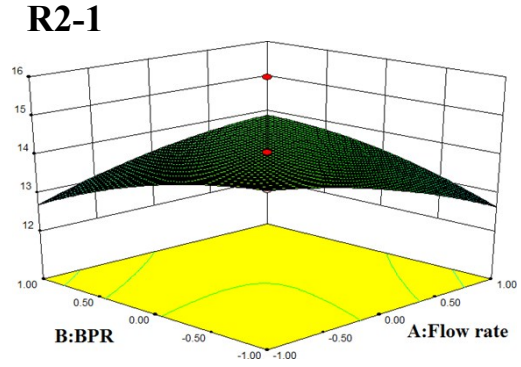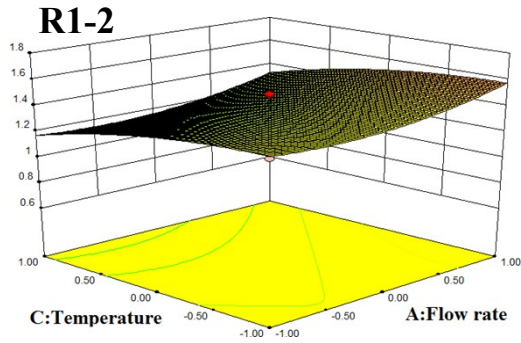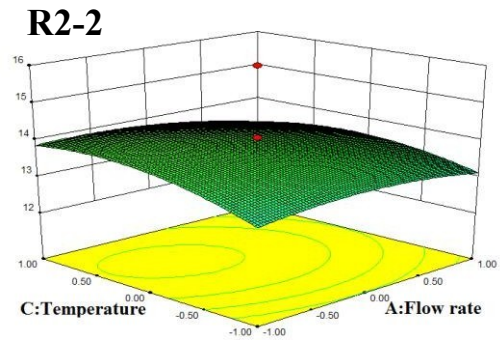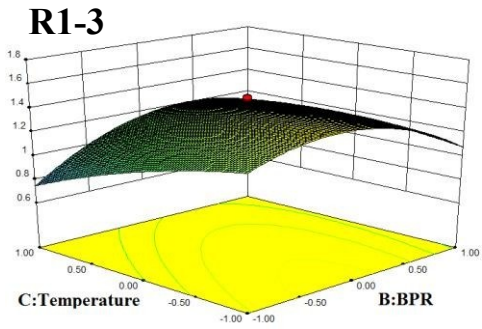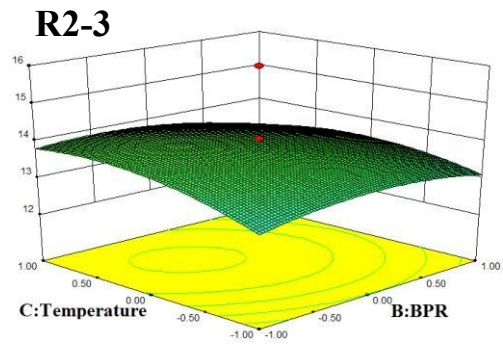

**Figure 2S. Response surface for Flow rate, Column temperature and Back pressure.**
